# Supplementary material for: A heteropolytungstate based 2D layered porous framework with high proton conductivity
Source: Royal Society of Chemistry journal article supplement (doi:10.1039/d3cc04517j), 2023-01-01
Supplement: d3cc04517j1.pdf [file d3cc04517j1.pdf]

## Supplementary Information

### **A heteropolytungstate based 2D layered porous framework with high proton conductivity**

Mengnan Yang, Yao Zhang, Shiyan Ji, Huafeng Li, Xinyi Ma, Yuzhen Jin, Pengtao

Ma, Jingping Wang\* and Jingyang Niu\*

#### **Corresponding Author**

\* Email: jyniu@henu.edu.cn (J. Niu); jpwang@henu.edu.cn (J. Wang)

## EXPERIMENTAL SECTION

### Materials and physical measurements

All chemicals were purchased commercially without further purification. Elemental analyses (C, N, and H) were recorded by means of an Elementar VarioELcube CHNS analyzer. IR spectra in the range of 400–4000  $\text{cm}^{-1}$  were recorded on a Bruker VERTEX 70 IR spectrometer via KBr pellets. The X-ray powder diffraction (XRD) patterns were recorded with an X-ray powder diffractometer (Bruker, D8 Advance) in the  $2\theta$  angular range of 5–50° under Cu  $K\alpha$  radiation. Thermogravimetric (TG) analyses were performed in a  $\text{N}_2$  atmosphere in the range of 25 to 1000 °C using a NETZSCH STA 449 F5 Jupiter thermal analyzer with a heating rate of 10  $\text{K min}^{-1}$ . A Perkin Elmer Optima 2100 DV spectrometer was selected for inductively coupled plasma-atomic emission spectrometry (ICP-AES) analyses (Na, Ru, Bi, and W). The X-ray photoelectron spectra (XPS) were measured on a Thermo Scientific K-Alpha spectrometer with monochromatic Al as the excitation source. Electrospray ionization-mass spectrometry (ESI-MS) was determined on an ABSCIEX triple-TOF 4600 mass spectrometer.

**Material**            **Preparation:**             $\text{Na}_6\text{H}_4 \cdot [\{\text{Ru}_2\text{O}(\text{bpy})_2\}_2\{\text{Bi}_2\text{W}_{32}\text{O}_{110}\}] \cdot 37\text{H}_2\text{O}$   
( $\text{Na}_6\text{H}_4 \cdot \mathbf{1} \cdot 37\text{H}_2\text{O}$ )

Simple raw materials  $\text{Na}_2\text{WO}_4 \cdot 2\text{H}_2\text{O}$  (4.00 g, 0.012 mol) and  $\text{Bi}_2\text{O}_3$  (0.12 g, 0.256 mmol) were dissolved in 8 mL deionized water and 4 mL 4 M hydrochloric acid respectively, the mixed solution was stirred until clarified, and then the pH of the above solution was adjusted to 4.4–5.2 with 4 M HCl. Next,  $\text{RuCl}_3$  (0.20 g, 0.96 mmol), 2,2'-

bipyridine (0.05 g, 0.32 mmol), CsCl (0.04 g, 0.23 mmol) and KCl (0.05 g, 0.67 mmol) were added to the resulting solution and stirred for 30 min, during which the solution changed from colorless to dark. The solution was stirred for 0.5 h and sealed in 25 mL Teflon-lined autoclave with heating at 433 K for 48 h. After cooling to room temperature, the solution was filtered and evaporated slowly. The black rhombic plate crystals were obtained after one week. Yield: 0.66% (0.05 g, based on Ru). Elemental analysis calcd (%) for **1**: Na, 1.52; Bi, 4.22; Ru, 4.26; W, 61.89; C, 4.68; N, 1.18; H, 1.30. Found: Na, 1.39; Bi, 4.21; Ru, 4.07; W, 59.34; C, 4.84; N, 1.13; H, 1.09. IR (KBr pellet,  $\text{cm}^{-1}$ ): 3433 (br), 1632 (s), 949 (s), 811 (s), 770 (s), 659 (w), 609 (w), 479 (w).

Parallel experiments indicated that the employment of CsCl and KCl was an indispensable part of the assembling process although they were not involved in the final structure of  $\text{Na}_6\text{H}_4\cdot\mathbf{1}\cdot 37\text{H}_2\text{O}$ . Controlled experiments also showed that without adding these two components, or replacing  $\text{Bi}_2\text{O}_3$  by  $\text{Sb}_2\text{O}_3$ , or changing 2,2'-bipyridine to 4,4'-bipyridine, the title compound could not be obtained, but lots of colorless crystals were identified as paratungstate  $[\text{H}_2\text{W}_{12}\text{O}_{42}]^{10-}$  over the entire evaporation period.

### **Proton conduction process**

Step one, the single crystals were uniformly ground into powder and then were put into a homemade mold with a radius of 0.15 cm to obtain circular pellets. The thickness was measured by a vernier caliper. And the thicknesses of the  $\text{Na}_6\text{H}_4\cdot\mathbf{1}\cdot 37\text{H}_2\text{O}$  sample was 1.22 mm. Step two, both sides of the pellets were coated with silver glue and dried naturally in air. Step three, the pellets were fixed on the sample stage with gold wires.

The proton conductivities were measured using a Solartron 1260 impedance/gain-phase analyzer with a Solartron 1296 dielectric interface (Ametek, UK) through the quasi-four-probe method over a frequency range from 0.1 Hz to 10 MHz within the input voltage of 100 mV. The measurements were operated at the temperatures ranged from 298 to 358 K, and the RHs from 35 to 85%. The impedances at each temperature were tested after equilibration for 2 h. The proton conductivity ( $\sigma$ ) of the sample is calculated according to the Nyquist plot and the following equation:

$$\sigma = \frac{L}{SR}$$

where L and S are the length (cm) and cross-sectional area (cm<sup>2</sup>) of the pressed plate, respectively, and R is the bulk resistance of the sample ( $\Omega$ ), which was extracted from the Nyquist plots. The activation energy ( $E_a$ ) was calculated using the following equations:

$$\ln \sigma T = \ln \sigma_0 - \frac{E_a}{kT}$$

$$k = 8.6 \times 10^{-5} \text{ eVK}^{-1}$$

where  $\sigma$  is the conductivity (S cm<sup>-1</sup>), K is the Boltzmann constant (eV K<sup>-1</sup>), and T is the temperature (K).

### **X-ray Crystallography**

Some suitable shapes crystal with appropriate size were selected and placed on a Bruker D8 VENTURE PHOTON II CCD diffractometer. The radiation source of graphite-monochromated Mo K $\alpha$  ( $\lambda = 0.71073 \text{ \AA}$ ) was used to collect the crystal data in the cooled nitrogen flow at 150 K. The SHELXT structure solution program was used to solve all the structures, and the SHELXL refinement package in Olex2 was used for the

full-matrix least-squares algorithm on  $F^2$  data. In the final refinement cycle, the C, O, Bi, Ru, W, N, and Na atoms were refined into anisotropy. The assignment of water molecules was supported by the IR spectra and TG results. Placing the hydrogen atoms from the organic ligands in the calculated position. CCDC contains the supplementary crystallographic data for this paper with deposition number 2270810 for  $\text{Na}_6\text{H}_4 \cdot \mathbf{1} \cdot 37\text{H}_2\text{O}$ . The crystallographic data can be obtained free of charge from The Cambridge Crystallographic Data Center via [http://www.ccdc.cam.ac.uk/data\\_request/cif](http://www.ccdc.cam.ac.uk/data_request/cif). **Table S1** shows the crystallographic data and structural refinement parameters for  $\text{Na}_6\text{H}_4 \cdot \mathbf{1} \cdot 37\text{H}_2\text{O}$ .

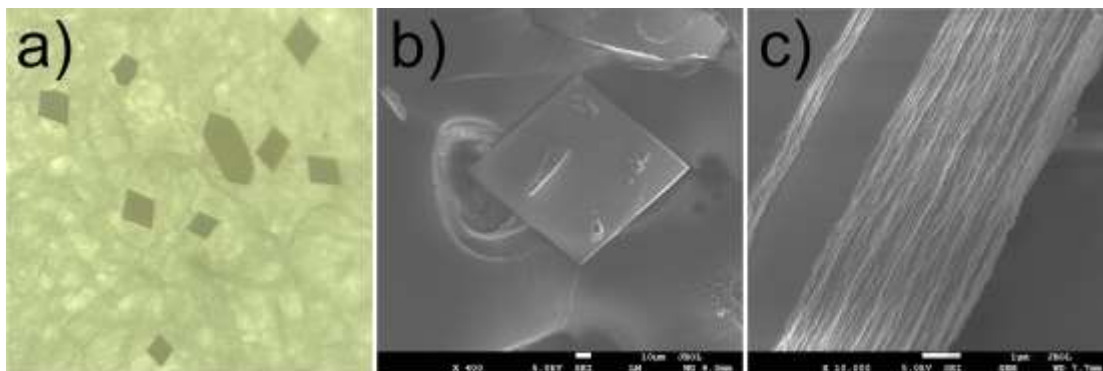

**Fig. S1** (a) Microscopic image of rhombic plate crystals of  $\text{Na}_6\text{H}_4 \cdot 1 \cdot 37\text{H}_2\text{O}$ , and (b, c) SEM images under various magnifications.

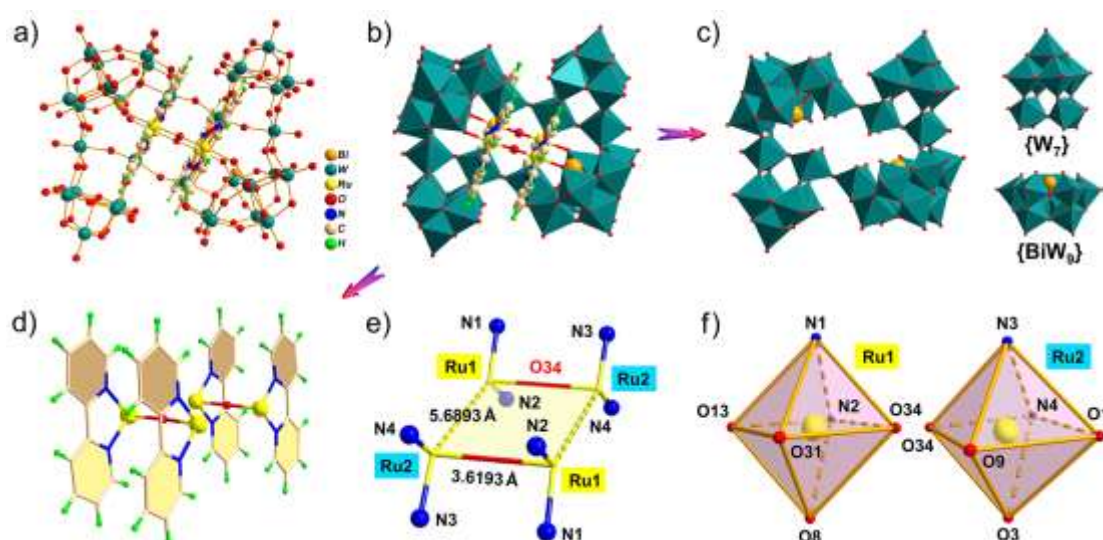

**Fig. S2** (a) Ball-and-stick representation and (b) polyhedral representation of cluster anion **1**; (c) an inorganic polyoxoanion  $\{\text{Bi}_2\text{W}_{32}\}^{22-}$  consist of centrosymmetric two pairs of  $\{\beta\text{-B-BiW}_9\text{O}_{33}\}^{9-}$  ( $\text{BiW}_9$ ) and  $\{\text{W}_7\text{O}_{22}\}^{2-}$  ( $\text{W}_7$ ) secondary units, and (d) two organic-hybrid-ruthenium  $\{\text{Ru}_2\text{O}(\text{bpy})_2\}^{6+}$  centre linkages in cluster **1**; (e) composition plan and (f) coordination environment of the Ru1 and Ru2 heteroatoms with the bpy ligands. Color code: C (tan), O (red), N (blue), H (green), W (teal), Bi (orange), Ru (yellow), and  $\text{WO}_6$  octahedra (teal).

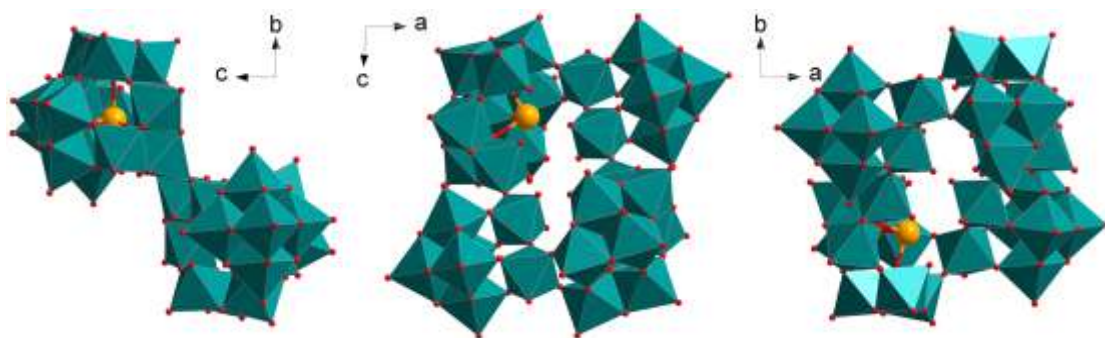

**Fig. S3** Polyhedral representation of inorganic polyoxoanion  $\{\text{Bi}_2\text{W}_{32}\}$  exemplified along three crystallographic axes.

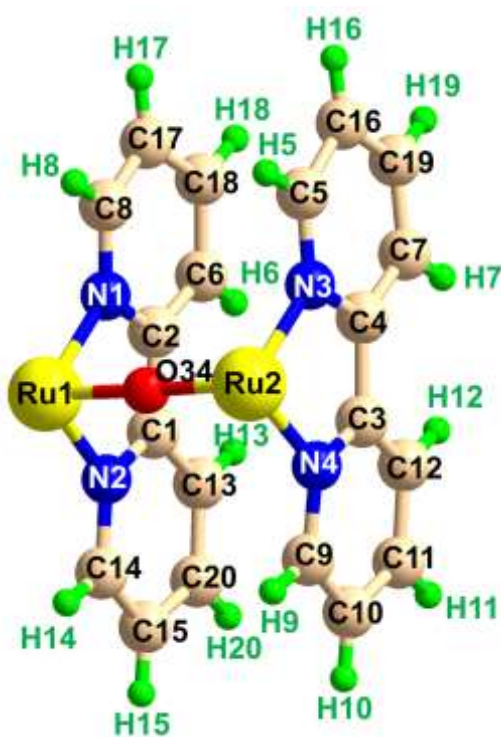

**Fig. S4** Ball and stick representation of organic-hybrid-ruthenium  $\{\text{Ru}_2\text{O}(\text{bpy})_2\}$  centre linkage in cluster 1.

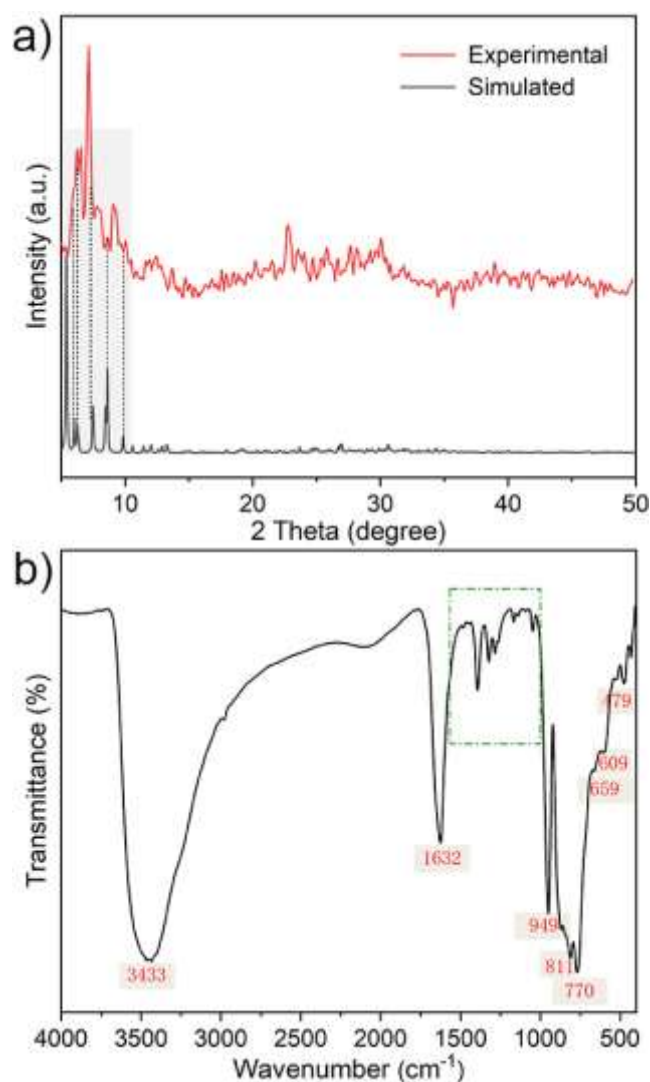

**Fig. S5** (a) Simulated and experimental XRD patterns; (b) IR spectrum of  $\text{Na}_6\text{H}_4\cdot\mathbf{1}\cdot 37\text{H}_2\text{O}$ .

The main diffraction peaks of the experimental XRD pattern of  $\text{Na}_6\text{H}_4\cdot\mathbf{1}\cdot 37\text{H}_2\text{O}$  agree with the simulated pattern, implying its good crystalline phase purity (**Fig. S5a**). The IR spectra (**Fig. S5b**) show the characteristic absorption peaks at about 949, 811, 770, and 659  $\text{cm}^{-1}$  attributed to the vibrations of  $\nu(\text{W}-\text{O}_b-\text{W})$ ,  $\nu(\text{Bi}-\text{O}_a)$ ,  $\nu(\text{W}-\text{O}_d)$ , and  $\nu(\text{W}-\text{O}_c)$ , respectively.<sup>1</sup> The vibration peaks observed at 3433 and 1632  $\text{cm}^{-1}$  are ascribed to the adsorbed and crystal water.<sup>2</sup> The band at 1000–1500  $\text{cm}^{-1}$  belongs to the vibration of bpy ( $\text{C}_{10}\text{H}_8\text{N}_2$ ) ligands.



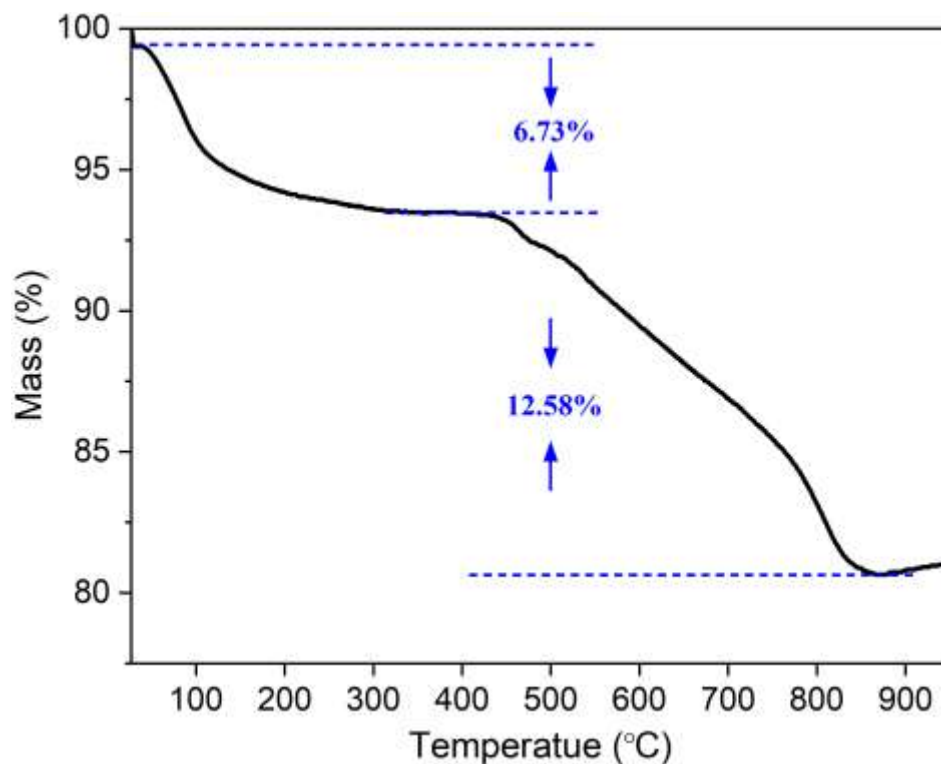

**Fig. S6** Thermogravimetric (TG) curve of  $\text{Na}_6\text{H}_4 \cdot \mathbf{1} \cdot 37\text{H}_2\text{O}$ .

The weight changes of compound  $\text{Na}_6\text{H}_4 \cdot \mathbf{1} \cdot 37\text{H}_2\text{O}$  in  $\text{N}_2$  atmosphere (**Fig. S6**) exhibit two-step weightlessness of 6.73% (30–440 °C) mainly due to the loss of thirty-seven crystal water molecules (the calculated equation is seen in our previous work ), and 12.58% at 440–800 °C assigned to the decomposition of cluster·**1** skeleton and the oxidation of bpy ligands.

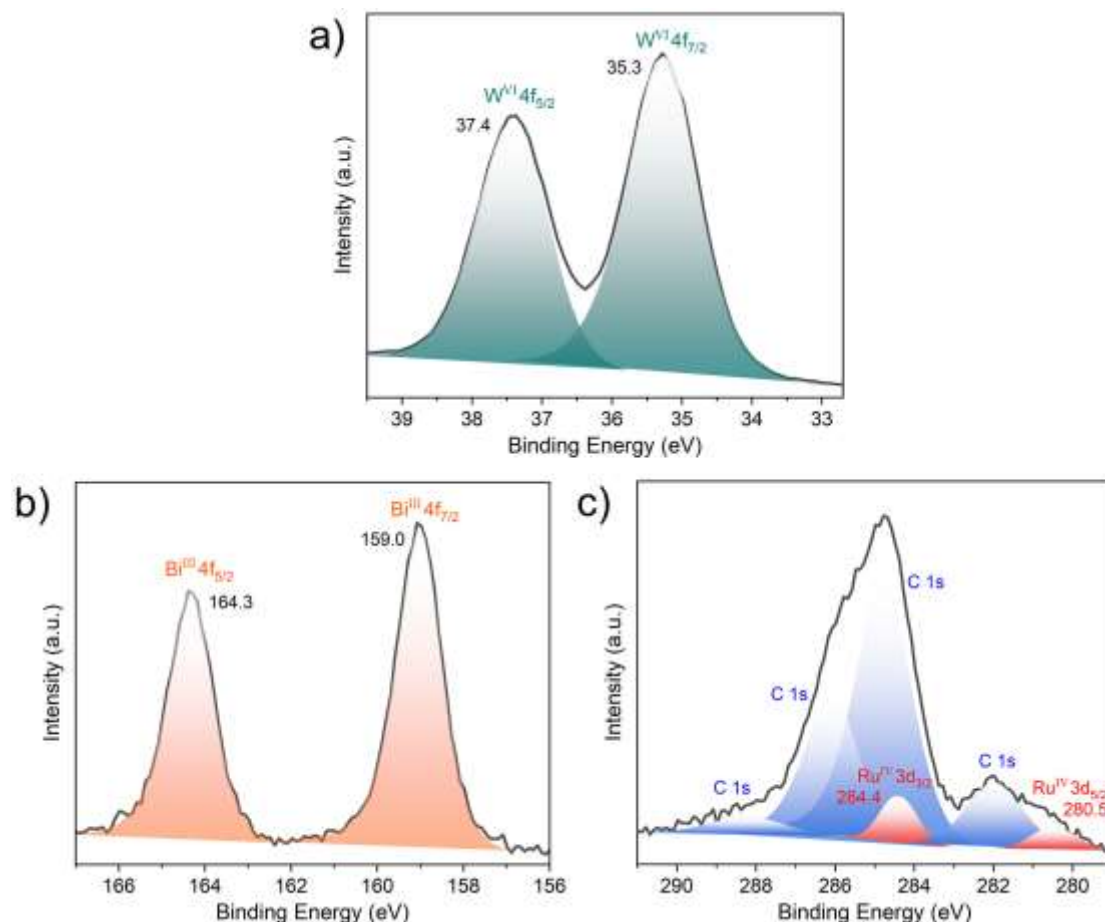

**Fig. S7** (a) W 4f, (b) Bi 4f, and (c) Ru 3d XPS spectra for the fresh sample of  $\text{Na}_6\text{H}_4\cdot\mathbf{1}\cdot 37\text{H}_2\text{O}$ .

High-resolution XPS spectra of W 4f, Bi 4f, and Ru 3d were recorded to further verify the valence states of cluster **1**. The XPS peaks of W 4f were observed at binding energies of 37.4 and 35.3 eV, corresponding to W  $3d_{5/2}$  and W  $3d_{7/2}$  of  $\text{W}^{\text{VI}}$  (**Fig. S7a**).<sup>3</sup> Meanwhile, the Bi 4f spectra (**Fig. S7b**) showed the peaks at 159.0 and 164.3 eV ascribed to Bi  $4f_{7/2}$  and Bi  $4f_{5/2}$  of the  $\text{Bi}^{\text{III}}$  oxidation state.<sup>4,5</sup> The Ru 3d spectra in **Fig. S7c** presented the peaks at 284.4 and 280.5 eV attributed to Ru  $3d_{3/2}$  and Ru  $3d_{5/2}$  of  $\text{Ru}^{\text{IV}}$ .<sup>6</sup> Thus, the XPS results supported the BVS calculations of cluster **1** in **Table S2**.

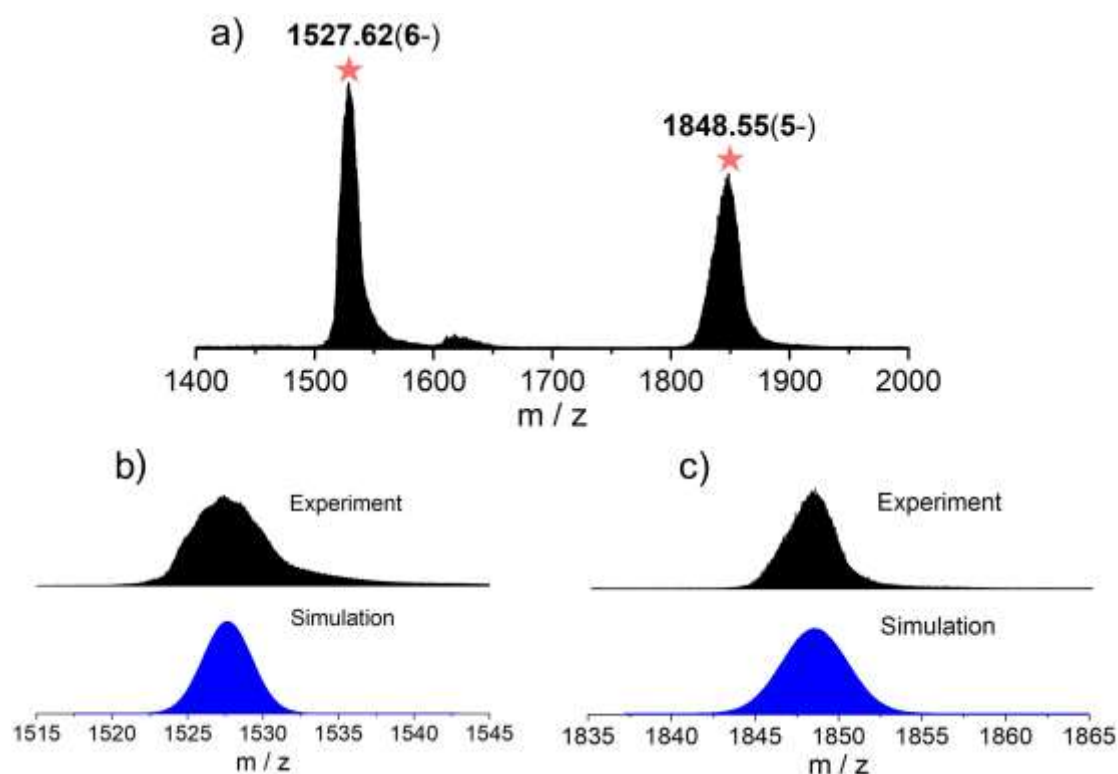

**Fig. S8** (a) The ESI-MS spectrum corresponding to the intact cluster; the simulated (blue) and experimental (black) patterns at around  $m/z$  (b) 1527.62, and (c) 1848.55.

To investigate the solution behaviour, cluster **1** was monitored utilizing high-resolution electrospray ionization mass spectrometry (ESI-MS) in aqueous solution (**Fig. S8**). The negative-ion ESI-MS showed two major peaks at  $m/z$  1527.62 (simulated 1527.64) and 1848.55 (simulated 1848.57) with charges of  $-6$  and  $-5$ , belong to  $[\text{Na}(\text{H}_2\text{O})\text{H}_3\{\text{Ru}_2\text{O}(\text{bpy})_2\}_2\{(\text{W}_7\text{O}_{22})(\text{BiW}_9\text{O}_{33})\}_2]^{6-}$  and  $[\text{Na}_2(\text{H}_2\text{O})_4\text{H}_3\{\text{Ru}_2\text{O}(\text{bpy})_2\}_2\{(\text{W}_7\text{O}_{22})(\text{BiW}_9\text{O}_{33})\}_2]^{5-}$ , respectively. It demonstrated that compound **1** remained intact as a cluster anion in aqueous solution, indicating its structural stability.

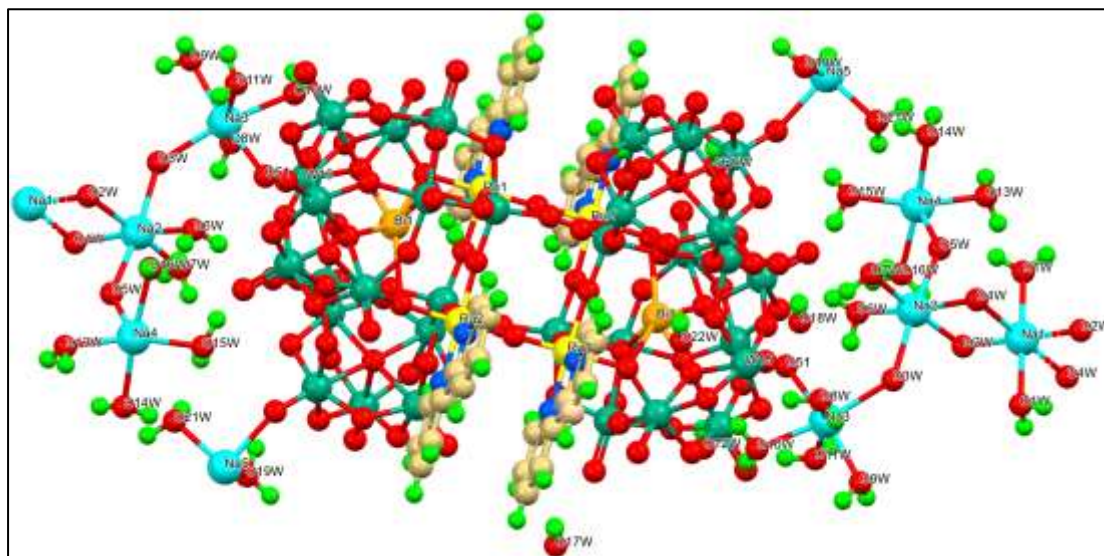

**Fig. S9** Na cations (Na1–5) and crystal waters represented as O(1–22)W in the crystal chemical unit of cluster anion 1.

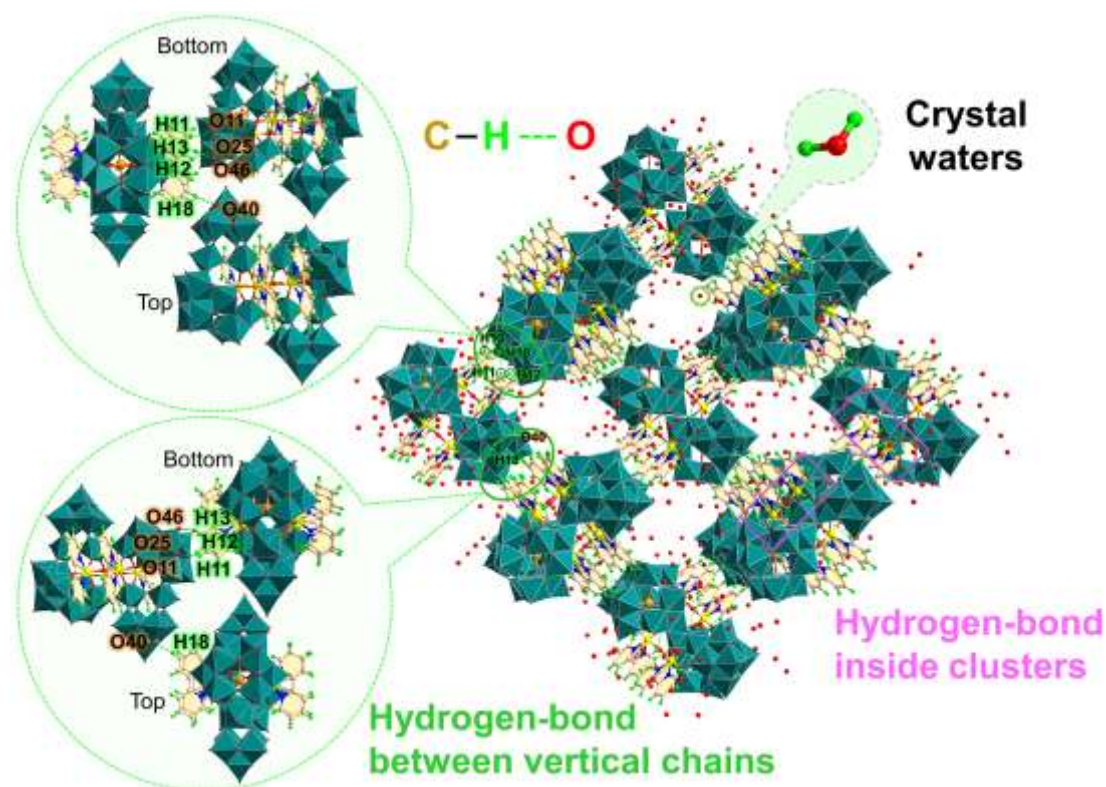

**Fig. S10** Weaving Na-bridged cluster chains into a layered porous framework through C–H $\cdots$ O hydrogen bonds between bpy ligands and inorganic polyoxoanions of vertical chains (for details see **Table S6**); therefore, forming the pore walls rich in crystal waters (O(1–22)W) coordinated to the Na cations and hydrogen bond interactions of C–H $\cdots$ O–W.

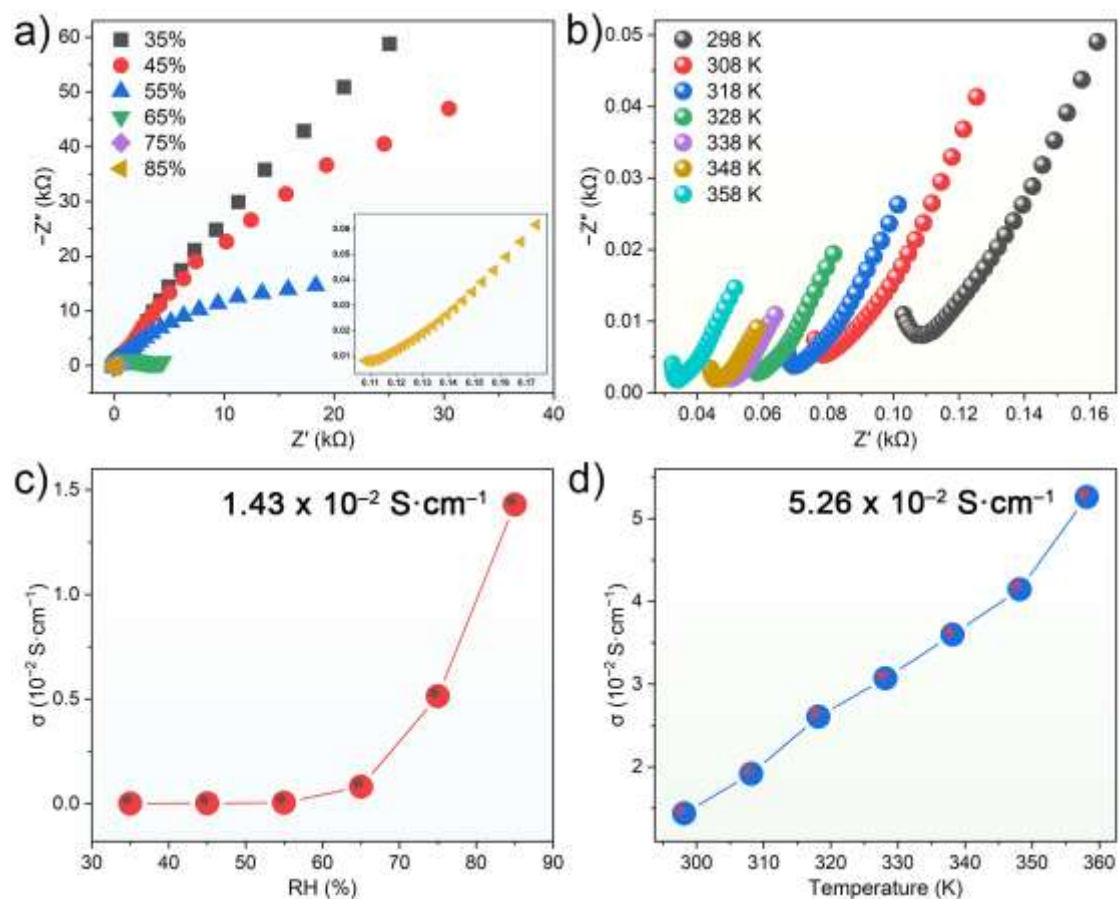

**Fig. S11** Nyquist plots of  $\text{Na}_6\text{H}_4 \cdot 1 \cdot 37\text{H}_2\text{O}$  (a) under different RHs at 298 K, and (b) at 85% RH under different temperatures; (c) RH-dependent and (d) temperature-dependent proton conductivities.

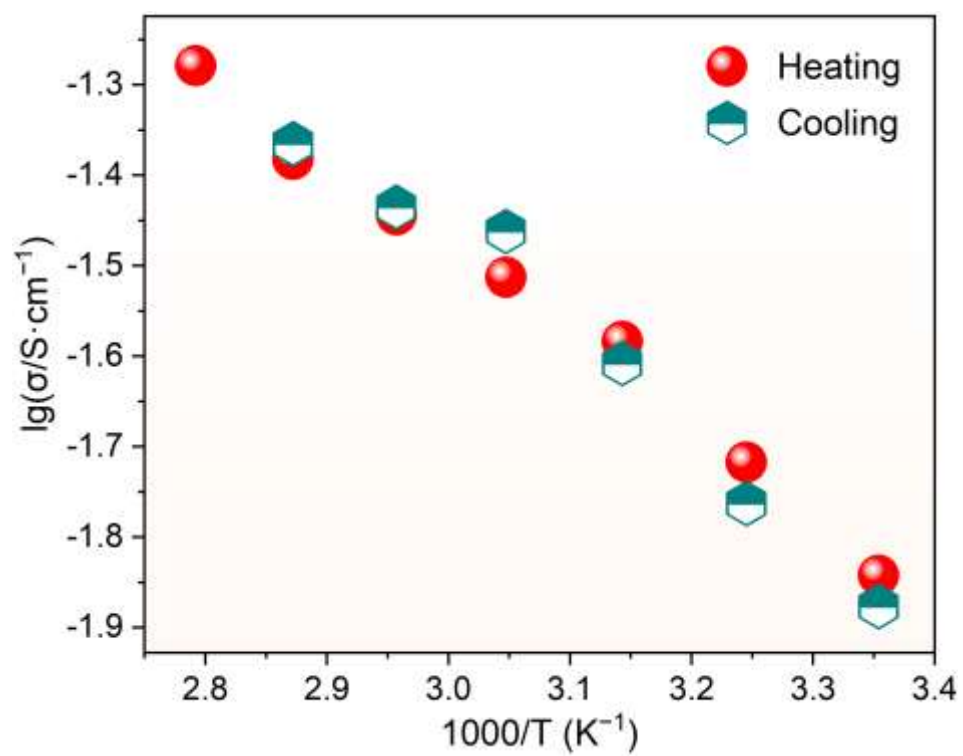

**Fig. S12** Log-scaled proton conductivities for the heating-cooling cycle at 85% RH.

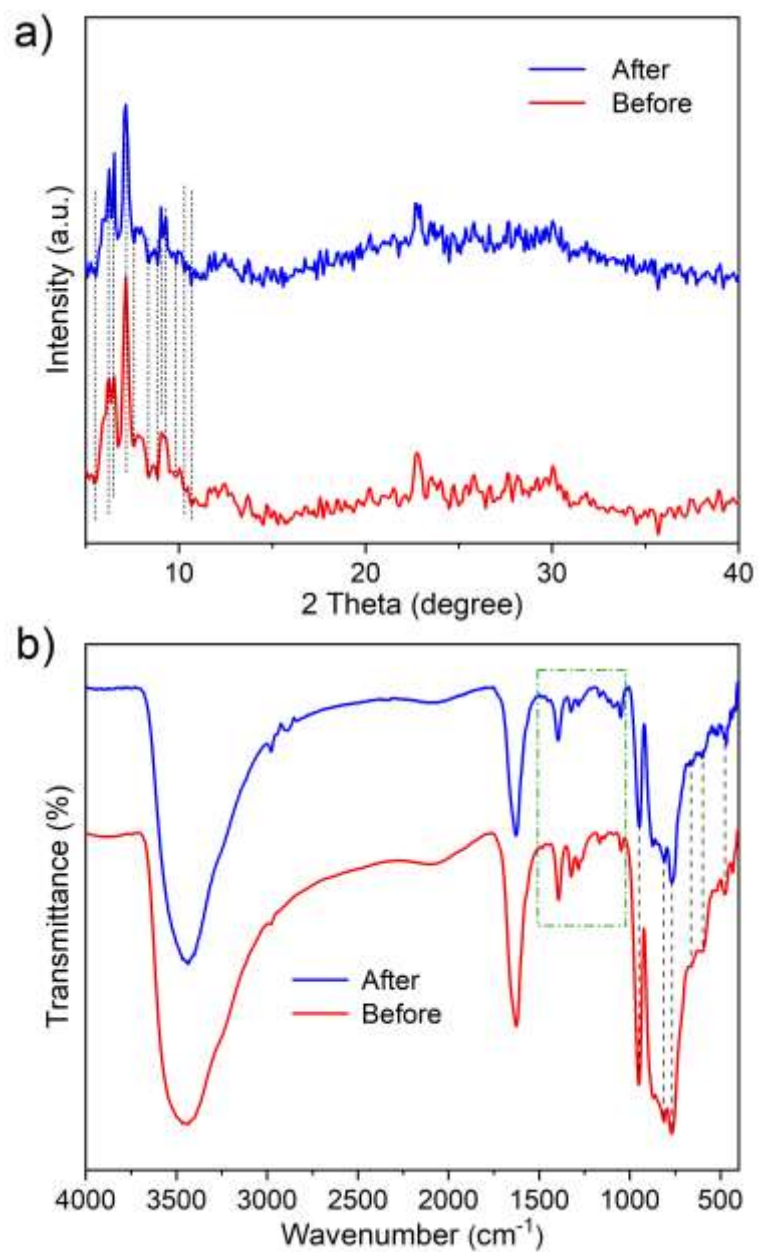

**Fig. S13** (a) XRD patterns and (b) IR spectra of  $\text{Na}_6\text{H}_4 \cdot \mathbf{1} \cdot 37\text{H}_2\text{O}$  before and after the proton conductivity measurement.

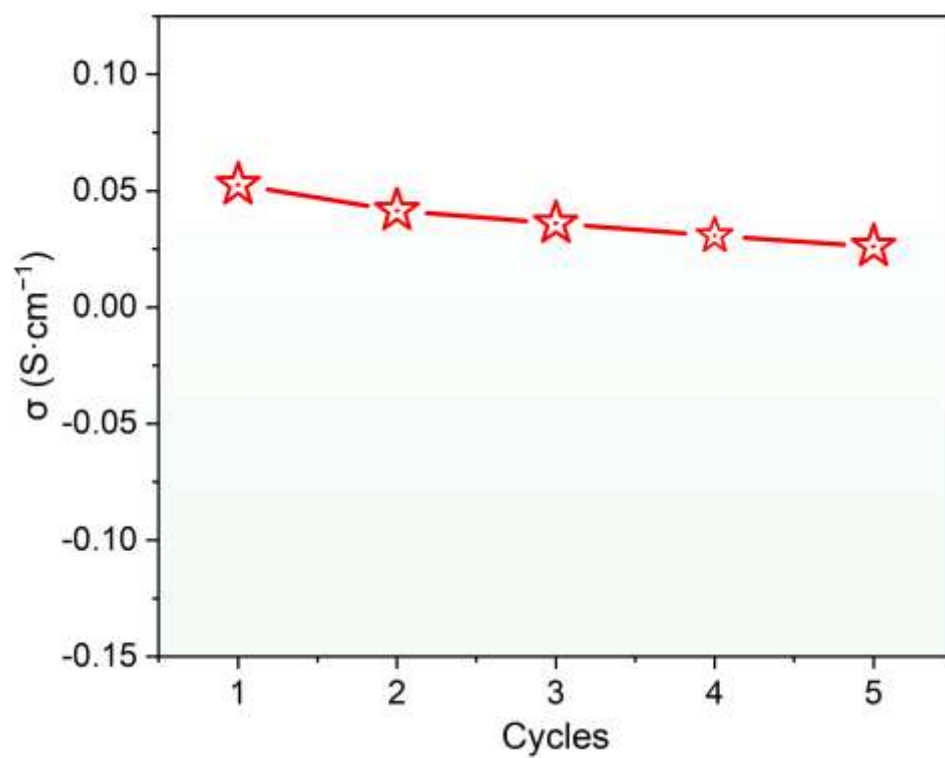

**Fig. S14** Stability of proton conductivity at 358 K and 85% RH for five cycles.



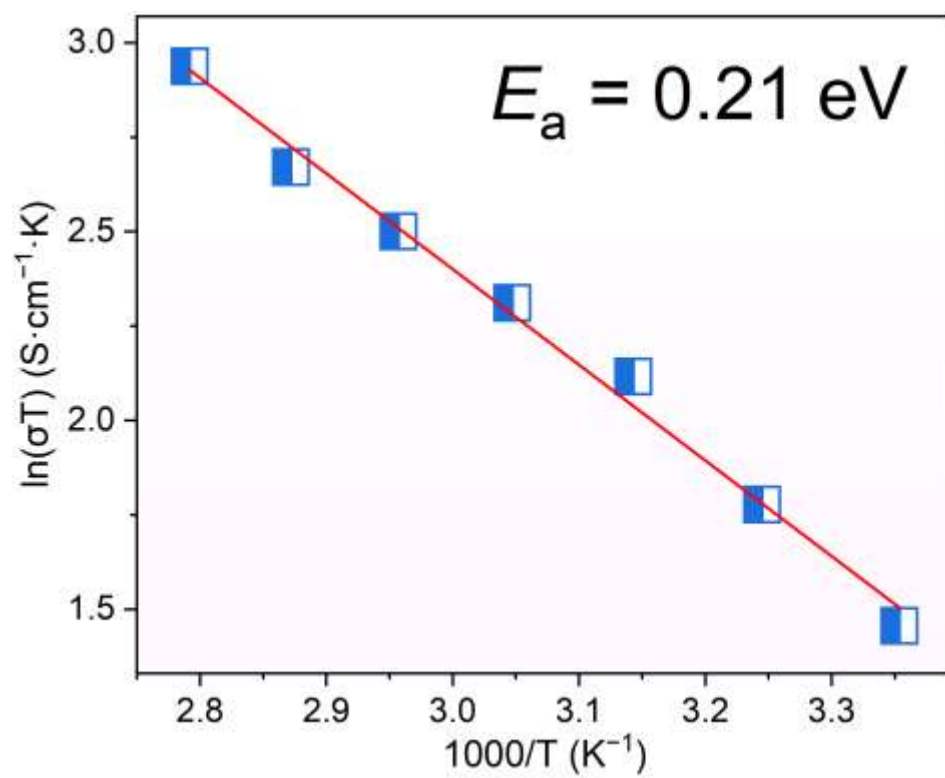

**Fig. S15** Arrhenius plots of  $\text{Na}_6\text{H}_4\cdot\mathbf{1}\cdot 37\text{H}_2\text{O}$  and linear fitting at 85% RH.

**Table S1** Crystal data and structure refinements for compound Na<sub>6</sub>H<sub>4</sub>·1·37H<sub>2</sub>O.

| Compound                                                                 | Na <sub>6</sub> H <sub>4</sub> ·1·37H <sub>2</sub> O                                                                            |
|--------------------------------------------------------------------------|---------------------------------------------------------------------------------------------------------------------------------|
| Formula                                                                  | C <sub>40</sub> H <sub>32</sub> Bi <sub>2</sub> N <sub>8</sub> Na <sub>6</sub> O <sub>145</sub> Ru <sub>4</sub> W <sub>32</sub> |
| <i>M</i>                                                                 | 9788.11                                                                                                                         |
| $\lambda/\text{\AA}$                                                     | 0.71073                                                                                                                         |
| <i>T</i> /K                                                              | 150 K                                                                                                                           |
| Crystal dimensions/mm                                                    | 0.1 × 0.08 × 0.07                                                                                                               |
| Crystal system                                                           | monoclinic                                                                                                                      |
| Space group                                                              | P2 <sub>1</sub> /n                                                                                                              |
| <i>a</i> /\AA                                                            | 17.9756(4)                                                                                                                      |
| <i>b</i> /\AA                                                            | 22.7835(7)                                                                                                                      |
| <i>c</i> /\AA                                                            | 23.5537(6)                                                                                                                      |
| $\alpha$ (°)                                                             | 90                                                                                                                              |
| $\beta$ (°)                                                              | 93.4190(10)                                                                                                                     |
| $\gamma$ (°)                                                             | 90                                                                                                                              |
| <i>V</i> /\AA <sup>3</sup>                                               | 9629.2(4)                                                                                                                       |
| <i>Z</i>                                                                 | 2                                                                                                                               |
| <i>D<sub>c</sub></i> /Mg m <sup>-3</sup>                                 | 3.376                                                                                                                           |
| $\mu/\text{mm}^{-1}$                                                     | 21.256                                                                                                                          |
| <i>F</i> (000)                                                           | 8528.0                                                                                                                          |
| <i>2</i> $\theta$ Range/°                                                | 4.524 to 50.198                                                                                                                 |
| Data/restraints/parameters                                               | 17126/24/1132                                                                                                                   |
| <i>R</i> <sub>1</sub> ( <i>I</i> > 2 $\sigma$ ( <i>I</i> )) <sup>a</sup> | 0.0399                                                                                                                          |
| <i>wR</i> <sub>2</sub> (all data) <sup>b</sup>                           | 0.1047                                                                                                                          |
| Goodness-of-fit on <i>F</i> <sup>2</sup>                                 | 1.019                                                                                                                           |

<sup>a</sup>  $R_1 = \frac{\sum ||F_o| - |F_c||}{\sum |F_o|}$ ,    <sup>b</sup>  $wR_2 = \left\{ \frac{\sum [w(F_o^2 - F_c^2)^2]}{\sum [w(F_o^2)^2]} \right\}^{1/2}$

**Table S2** BVS values of Ru, Bi, W, and selected O atoms of compound  $\text{Na}_6\text{H}_4 \cdot 1 \cdot 37\text{H}_2\text{O}$ .

| Atom | BVS   | Atom | BVS   | Atom | BVS   | Atom | BVS   |
|------|-------|------|-------|------|-------|------|-------|
| Ru1  | 4.444 | Ru2  | 4.551 | Bi1  | 2.717 | W1   | 6.352 |
| W2   | 6.084 | W3   | 6.083 | W4   | 6.013 | W5   | 6.014 |
| W10  | 6.078 | W11  | 6.091 | W12  | 6.159 | W13  | 6.150 |
| W14  | 5.964 | W15  | 6.077 | W16  | 6.166 | O1   | 1.920 |
| O2   | 1.463 | O3   | 2.122 | O4   | 2.021 | O5   | 2.136 |
| O10  | 1.768 | O11  | 1.924 | O12  | 2.097 | O13  | 1.941 |
| O14  | 1.828 | O15  | 1.976 | O16  | 1.998 | O17  | 1.970 |
| O22  | 2.042 | O23  | 1.894 | O24  | 1.809 | O25  | 2.005 |
| O26  | 2.003 | O27  | 1.853 | O28  | 1.908 | O29  | 1.862 |
| O30  | 1.832 | O31  | 2.094 | O32  | 1.613 | O33  | 1.877 |
| O34  | 2.361 | O35  | 2.022 | O36  | 1.941 | O37  | 1.919 |
| O50  | 1.754 | O51  | 2.492 | O52  | 1.730 | O53  | 1.671 |
| O54  | 1.680 | O55  | 1.626 | O56  | 1.861 |      |       |

**Table S3** Selected bond distances of compound  $\text{Na}_6\text{H}_4\cdot\mathbf{1}\cdot 37\text{H}_2\text{O}$ .

| $\text{Na}_6\text{H}_4\cdot\mathbf{1}\cdot 37\text{H}_2\text{O}$ |            |         |            |         |            |
|------------------------------------------------------------------|------------|---------|------------|---------|------------|
| Ru1-N1                                                           | 2.022 (11) | Ru2-N3  | 2.017 (12) | W13-O5  | 2.217 (8)  |
| Ru1-N2                                                           | 2.010 (11) | Ru2-N4  | 2.010 (11) | W13-O42 | 1.919 (12) |
| Ru1-O8                                                           | 2.053 (9)  | Ru2-O1  | 2.004 (9)  | W13-O11 | 1.877 (9)  |
| Ru1-O13                                                          | 2.009 (10) | Ru2-O3  | 2.020 (9)  | W13-O19 | 1.945 (8)  |
| Ru1-O31                                                          | 2.043 (9)  | Ru2-O9  | 2.034 (9)  | W13-O36 | 1.919 (11) |
| Ru1-O34                                                          | 1.811 (10) | Ru2-O34 | 1.806 (10) | W13-O49 | 1.726 (11) |
| W1-O2                                                            | 1.776 (9)  | W1-O3   | 1.778 (9)  | W4-O17  | 1.942 (10) |
| W4-O17                                                           | 1.942 (10) | W4-O21  | 2.307 (10) | W11-O21 | 2.263 (8)  |
| W4-O23                                                           | 1.934 (10) | W11-O18 | 1.884 (10) | W11-O40 | 1.956 (11) |
| Bi1-O5                                                           | 2.136 (9)  | Bi1-O10 | 2.135 (10) | Bi1-O12 | 2.121 (8)  |
| W11-O48                                                          | 1.726 (9)  | W1-O8   | 1.750 (9)  | W1-O22  | 2.112 (9)  |
| W2-O4                                                            | 1.792 (10) | W2-O9   | 1.785 (9)  | W9-O10  | 2.226 (10) |
| W9-O13                                                           | 1.833 (10) | W9-O15  | 1.973 (10) | W9-O30  | 1.973 (9)  |
| W16-O10                                                          | 2.285 (9)  | W16-O25 | 1.902 (11) | W16-O52 | 1.727 (10) |

**Table S4** Selected bond angles (°) of compound Na<sub>6</sub>H<sub>4</sub>·1·37H<sub>2</sub>O.

| Na <sub>6</sub> H <sub>4</sub> ·1·37H <sub>2</sub> O |           |             |           |             |           |
|------------------------------------------------------|-----------|-------------|-----------|-------------|-----------|
| O10-Bi1-O5                                           | 84.9 (4)  | O12-Bi1-O5  | 89.7 (3)  | O12-Bi1-O10 | 88.5 (3)  |
| O2-W1-O3                                             | 98.3 (4)  | O2-W1-O4    | 166.8 (4) | O2-W1-O22   | 89.1 (4)  |
| O3-W1-O24                                            | 88.3 (4)  | O4-W1-O22   | 80.4 (4)  | O8-W1-O2    | 97.8 (4)  |
| O8-W1-O3                                             | 101.3 (4) | O8-W1-O22   | 89.4 (4)  | O8-W1-O24   | 166.8 (4) |
| O4-W2-O12                                            | 167.2 (3) | O4-W2-O14   | 97.2 (4)  | O9-W2-O4    | 102.6 (4) |
| O9-W2-O12                                            | 86.0 (4)  | O19-W6-O2   | 83.8 (4)  | O20-W6-O2   | 84.2 (4)  |
| O28-W6-O2                                            | 82.7 (4)  | O56-W6-O2   | 178.1 (4) | O6-W7-O12   | 75.3 (4)  |
| O4-W7-O1                                             | 85.0 (4)  | O4-W7-O2    | 165.5 (4) | O4-W7-O5    | 85.3 (4)  |
| O15-W7-O6                                            | 157.8 (4) | O27-W7-O6   | 90.6 (4)  | O35-W7-O12  | 86.2 (4)  |
| O54-W7-O6                                            | 97.7 (4)  | O1-W8-O5    | 85.9 (4)  | O16-W8-O5   | 84.9 (4)  |
| O29-W8-O5                                            | 74.8 (4)  | O36-W8-O5   | 73.4 (4)  | O55-W8-O1   | 103.2 (5) |
| O13-W9-O10                                           | 84.9 (4)  | O15-W9-O10  | 84.5 (4)  | O30-W9-O10  | 75.4 (4)  |
| O43-W9-O10                                           | 74.4 (4)  | O45-W9-O10  | 169.9 (5) | O26-W10-O21 | 75.3 (4)  |
| O28-W10-O21                                          | 85.1 (4)  | O33-W10-O21 | 78.2 (4)  | O37-W10-O21 | 75.3 (4)  |
| O50-W10-O21                                          | 174.4 (4) | O18-W11-O21 | 77.3 (3)  | O37-W11-O21 | 76.2 (5)  |
| O40-W11-O21                                          | 76.4 (3)  | O41-W11-O18 | 91.5 (5)  | O48-W11-O18 | 103.5 (4) |
| O34-Ru1-O8                                           | 92.4 (4)  | O34-Ru1-N1  | 89.7 (4)  | O1-Ru2-O3   | 87.5 (4)  |
| N1-Ru1-N2                                            | 81.4 (5)  | N3-Ru2-N4   | 80.2 (5)  | Ru1-O13-W9  | 138.9 (5) |
| Ru1-O31-W2                                           | 176.0 (6) | Ru1-O8-W1   | 175.1 (5) | Ru2-O1-W8   | 138.7 (5) |
| Ru2-O9-W2                                            | 174.8 (6) | Ru2-O3-W1   | 173.3 (5) |             |           |

**Table S5** Atomic parameters of Na cations, and O(1–22)W atoms represented the attached crystal waters (pink background) and isolate crystal waters (last five).

| <b>Atom</b> | <b><i>a</i></b> | <b><i>b</i></b> | <b><i>c</i></b> |
|-------------|-----------------|-----------------|-----------------|
| <b>Na1</b>  | 0               | 0.5000          | 0.5000          |
| <b>Na2</b>  | 0.0306(5)       | 0.3849(4)       | 0.6044(4)       |
| <b>Na3</b>  | -0.0249(5)      | 0.4423(5)       | 0.7838(5)       |
| O51         | 0.5281(5)       | 0.8329(5)       | 0.7181(5)       |
| <b>Na4</b>  | -0.0169(7)      | 0.2230(6)       | 0.4997(5)       |
| O1W         | 0.0091(5)       | 0.4131(6)       | 0.4440(5)       |
| O2W         | -0.0704(5)      | 0.3980(4)       | 0.4600(4)       |
| O3W         | 0.0112(7)       | 0.4563(7)       | 0.6828(6)       |
| O4W         | 0.1119(6)       | 0.4571(6)       | 0.5440(6)       |
| O5W         | 0.0253(9)       | 0.3196(9)       | 0.5218(7)       |
| O6W         | -0.0432(9)      | 0.3114(6)       | 0.6527(6)       |
| O7W         | 0.1393(8)       | 0.3470(7)       | 0.6467(8)       |
| O8W         | 0.1089(11)      | 0.4661(11)      | 0.8043(10)      |
| O9W         | -0.0658(11)     | 0.5391(9)       | 0.7889(10)      |
| O10W        | -0.0223(15)     | 0.4256(10)      | 0.8865(11)      |
| O11W        | -0.1567(15)     | 0.4300(14)      | 0.7983(14)      |
| O13W        | -0.0577(8)      | 0.2493(7)       | 0.4055(6)       |
| O14W        | 0.0906(14)      | 0.1809(13)      | 0.4542(10)      |
| O15W        | 0.0449(8)       | 0.1797(8)       | 0.5834(6)       |
| O16W        | -0.1175(9)      | 0.2620(11)      | 0.5532(10)      |

|      |            |            |            |
|------|------------|------------|------------|
| Na5  | 0.2404(12) | 0.0782(9)  | 0.5511(7)  |
| O53  | 0.2966(6)  | 0.5981(6)  | 0.8533(5)  |
| O19W | 0.6318(16) | 0.8973(15) | 0.4014(12) |
| O21W | 0.2221(12) | 0.1754(10) | 0.5298(9)  |
| O12W | -0.0572(6) | 0.7020(6)  | 0.6529(5)  |
| O17W | 0.1721(8)  | 0.2353(7)  | 0.6236(6)  |
| O18W | 0.3646(9)  | 0.8526(9)  | 0.7330(9)  |
| O20W | 0.4716(9)  | 0.5227(9)  | 0.7958(11) |
| O22W | 0.3849(11) | 0.7729(14) | 0.5880(10) |

**Table S6** The hydrogen bonds between vertical cluster chains (first four), and inside clusters (last four) corresponding to **Fig. S10**.

| D–H...A          | d(H...A) | d(D...A) | <(DHA)  |
|------------------|----------|----------|---------|
| C11–H11...O11    | 2.6367   | 3.3978   | 137.431 |
| C12–H12...O25 #1 | 2.3603   | 3.0700   | 131.186 |
| C13–H13...O46 #2 | 2.3257   | 3.1395   | 143.580 |
| C18–H18...O40    | 2.6731   | 3.4783   | 142.815 |
| C5–H5...O3 #3    | 2.5879   | 3.1662   | 119.476 |
| C8–H8...O31      | 2.6627   | 3.2130   | 117.474 |
| C9–H9...O9 #4    | 2.6525   | 3.2013   | 117.281 |
| C14–H14...O8 #5  | 2.5543   | 3.1171   | 118.134 |

Symmetry transformations used to generate equivalent atoms: #1 x, y, z, #2 -x+1,-y+1,-z+1, #3 x, y, z, #4 x ,y, z, #5 x, y, z

**Table S7** Summary of the resistance values extracted from equivalent circuit fitting of the Nyquist plots for  $\text{Na}_6\text{H}_4 \cdot 1.37\text{H}_2\text{O}$  under different RHs at room temperature, and at 85% RH under different temperatures.

| Sample                                               | RH (%) | $R_{\text{total}}$ (ohm) | $\sigma_{\text{total}}$ (ohm) |
|------------------------------------------------------|--------|--------------------------|-------------------------------|
| $\text{Na}_6\text{H}_4 \cdot 1.37\text{H}_2\text{O}$ | 35     | 126101.46                | $1.36 \times 10^{-5}$         |
|                                                      | 45     | 76815.5                  | $2.24 \times 10^{-5}$         |
|                                                      | 55     | 32728                    | $5.27 \times 10^{-5}$         |
|                                                      | 65     | 2099.9                   | $8.21 \times 10^{-4}$         |
|                                                      | 75     | 335.24                   | $5.14 \times 10^{-3}$         |
|                                                      | 85     | 120                      | $1.43 \times 10^{-2}$         |
|                                                      | T (K)  | $R_{\text{total}}$ (ohm) | $\sigma_{\text{total}}$ (ohm) |
|                                                      | 298    | 120                      | $1.43 \times 10^{-2}$         |
|                                                      | 308    | 90                       | $1.91 \times 10^{-2}$         |
|                                                      | 318    | 66.19                    | $2.60 \times 10^{-2}$         |
|                                                      | 328    | 56.2                     | $3.07 \times 10^{-2}$         |
|                                                      | 338    | 47.94                    | $3.59 \times 10^{-2}$         |
|                                                      | 348    | 41.62                    | $4.14 \times 10^{-2}$         |
|                                                      | 358    | 32.79                    | $5.26 \times 10^{-2}$         |



**Table S8** Summary of proton conductive crystals based on POMs.

| Compound                                                                                                                                                                                                                                                                                                                                               | $\sigma$ (S cm <sup>-1</sup> )                                                     | $E_a$ (eV) | Conditions                     |
|--------------------------------------------------------------------------------------------------------------------------------------------------------------------------------------------------------------------------------------------------------------------------------------------------------------------------------------------------------|------------------------------------------------------------------------------------|------------|--------------------------------|
| H[Ce(H <sub>2</sub> O) <sub>4</sub> ] <sub>2</sub> [MnV <sub>13</sub> O <sub>38</sub> ]·9NMP·17H <sub>2</sub> O <sup>7</sup><br>(3D porous framework)                                                                                                                                                                                                  | $4.68 \times 10^{-3}$                                                              | 0.45       | 334 K, 97% RH                  |
| {Na <sub>7</sub> [( <i>n</i> Bu) <sub>4</sub> N] <sub>17</sub> }[Zn(P <sub>3</sub> Mo <sub>6</sub> O <sub>29</sub> ) <sub>2</sub> ] <sub>2</sub> · <i>x</i> G<br>(G=guest solvent molecules) <sup>8</sup> (3D porous<br>framework)                                                                                                                     | $1.04 \times 10^{-2}$                                                              | 0.22       | 353 K, 75% RH                  |
| H <sub>13</sub> (HIm) <sub>4</sub> K <sub>2</sub> Na <sub>4</sub> (H <sub>2</sub> O) <sub>9</sub> [Sb <sub>9</sub> SbSm <sub>3</sub> O <sub>14</sub> (H <sub>2</sub> O) <sub>3</sub> ]<br>[(SbW <sub>9</sub> O <sub>33</sub> ) <sub>3</sub> (PW <sub>9</sub> O <sub>34</sub> )]·26H <sub>2</sub> O <sup>9</sup> (1D porous<br>framework)               | $1.64 \times 10^{-2}$                                                              | 0.54       | 358 K, 98% RH                  |
| Na <sub>22</sub> {(SbW <sub>9</sub> O <sub>33</sub> ) <sub>4</sub> [La <sub>3</sub> W <sub>6</sub> MnO <sub>18</sub> (H <sub>2</sub> O) <sub>8</sub> (CH <sub>3</sub> C<br>OO) <sub>4</sub> ] <sub>2</sub> }· <i>n</i> H <sub>2</sub> O <sup>10</sup> (3D porous framework)                                                                            | $2.3 \times 10^{-2}$                                                               | 0.327      | 338 K, 90% RH                  |
| Na <sub>5.5</sub> H <sub>6.5</sub> [(SbW <sub>9</sub> O <sub>33</sub> ) <sub>2</sub> {WO <sub>2</sub> (OH)} <sub>2</sub> {WO <sub>2</sub> }Ru<br>C <sub>7</sub> H <sub>3</sub> NO <sub>4</sub> ]·36H <sub>2</sub> O <sup>11</sup> (3D porous framework)                                                                                                | $2.97 \times 10^{-2}$                                                              | 0.31       | 348 K, 75% RH                  |
| Na <sub>16</sub> (NH <sub>4</sub> ) <sub>10</sub> H <sub>8</sub> {[W <sub>14</sub> Ce <sub>6</sub> O <sub>61</sub> ]}([W <sub>3</sub> Bi <sub>6</sub> Ce <sub>3</sub> (H <sub>2</sub> O<br>) <sub>3</sub> O <sub>14</sub> ][BiW <sub>9</sub> O <sub>33</sub> ] <sub>3</sub> ) <sub>2</sub> }·38H <sub>2</sub> O <sup>12</sup> (3D porous<br>framework) | $2.4 \times 10^{-3}$                                                               | 0.677      | 298 K, 90% RH                  |
| 3D-{Mo <sub>154</sub> } <sub>n</sub> framework <sup>13</sup>                                                                                                                                                                                                                                                                                           | $1.1 \times 10^{-2}$                                                               | 0.264      | 295 K, 100% RH                 |
| Na <sub>6</sub> H <sub>4</sub> · <b>1</b> ·37H <sub>2</sub> O (2D layered porous<br>framework)                                                                                                                                                                                                                                                         | <b><math>1.43 \times 10^{-2}</math></b><br><b><math>5.26 \times 10^{-2}</math></b> | 0.21       | 298 K, 85% RH<br>358 K, 85% RH |

NMP = N-methyl-2-pyrrolidone; Im = imidazole.

## References

- 1 Xin X, Ma Y, Hou L, *et al.* Krebs-type  $\{M_2(WO_2)_2[B-\beta-SbW_9O_{33}]_2\}^{n-}$  ( $M = Sb^{III}, (WO_3)$ ) tungstoantimonate possessing unique pseudo-seesaw Sb–O structure. *Inorg Chem*, 2019, 58: 9567-9571
- 2 Ma P, Wan R, Si Y, *et al.* Double-malate bridging tri-lanthanoid cluster encapsulated arsenotungstates: Syntheses, structures, luminescence and magnetic properties. *Dalton Trans*, 2015, 44: 11514-11523
- 3 Feng W, Ding Y, Liu Y, *et al.* The photochromic process of polyoxometalate-based nanocomposite thin film by in situ afm and spectroscopy. *Mater Chem Phys*, 2006, 98: 347-352
- 4 Ni L, Patscheider J, Baldrige KK, *et al.* New perspectives on polyoxometalate catalysts: Alcohol oxidation with Zn/Sb-polyoxotungstates. *Chem Eur J*, 2012, 18: 13293-13298
- 5 Wang X-F, Liu X-Y, Su F, *et al.* Enhanced corrosion resistance of carbon steel in hydrochloric acid solution by polyoxometalate-estertin derivatives. *ACS Omega*, 2022, 7: 4429-4443
- 6 Zhang K, Bin D, Yang B, *et al.* Ru-assisted synthesis of Pd/Ru nanodendrites with high activity for ethanol electrooxidation. *Nanoscale*, 2015, 7: 12445-12451
- 7 Wang J-X, Wang Y-D, Wei M-J, *et al.* Inorganic open framework based on lanthanide ions and polyoxometalates with high proton conductivity. *Inorg Chem Front*, 2018, 5: 1213-1217
- 8 Gao Q, Wang X-L, Xu J, *et al.* The first demonstration of the gyroid in a polyoxometalate-based open framework with high proton conductivity. *Chem Eur J*, 2016, 22: 9082-9086
- 9 Xiao H-P, Zhang R-T, Li Z, *et al.* Organoamine-directed assembly of 5p–4f heterometallic cluster substituted polyoxometalates: Luminescence and proton conduction properties. *Inorg*

Chem, 2021, 60: 13718-13726

- 10 Wang H, Xu H, Chen C, *et al.* Parallelogram 3d-4f-5d heterometallic clusters based on trilacunary tungstoantimonates with excellent proton conductivity. *Chin Chem Lett*, 2023, 108486
- 11 Yang M, Li H, Zhang Y, *et al.* Organic hybrid antimoniotungstate layered ionic crystal: Synthesis, structure, and interlayer-confined proton conduction. *Inorg Chem*, 2023, 62: 6467-6473
- 12 Liu J-C, Han Q, Chen L-J, *et al.* Aggregation of giant cerium–bismuth tungstate clusters into a 3D porous framework with high proton conductivity. *Angew Chem Int Ed*, 2018, 57: 8416-8420
- 13 Wang H-Y, Li S-R, Wang X, *et al.* Enhanced proton conductivity of Mo<sub>154</sub>-based porous inorganic framework. *Sci China Chem*, 2021, 64: 959-963
